# Supplementary material for: The Anticancer Ruthenium Compound BOLD-100 Targets Glycolysis and Generates a Metabolic Vulnerability towards Glucose Deprivation
Source: MDPI journal article supplement (doi:10.3390/pharmaceutics14020238), 2022-01-20
Supplement: s1 [file s1]

# Supplementary Materials: The Anticancer Ruthenium Compound BOLD-100 Targets Glycolysis and Generates a Metabolic Vulnerability towards Glucose Deprivation

Dina Baier, Beatrix Schoenhacker-Alte, Mate Rusz, Christine Pirker, Thomas Mohr, Theresa Mendrina, Dominik Kirchhofer, Samuel M. Meier-Menches, Katharina Hohenwallner, Martin Schaier, Evelyn Rampler, Gunda Koellensperger, Petra Heffeter, Bernhard Keppler and Walter Berger

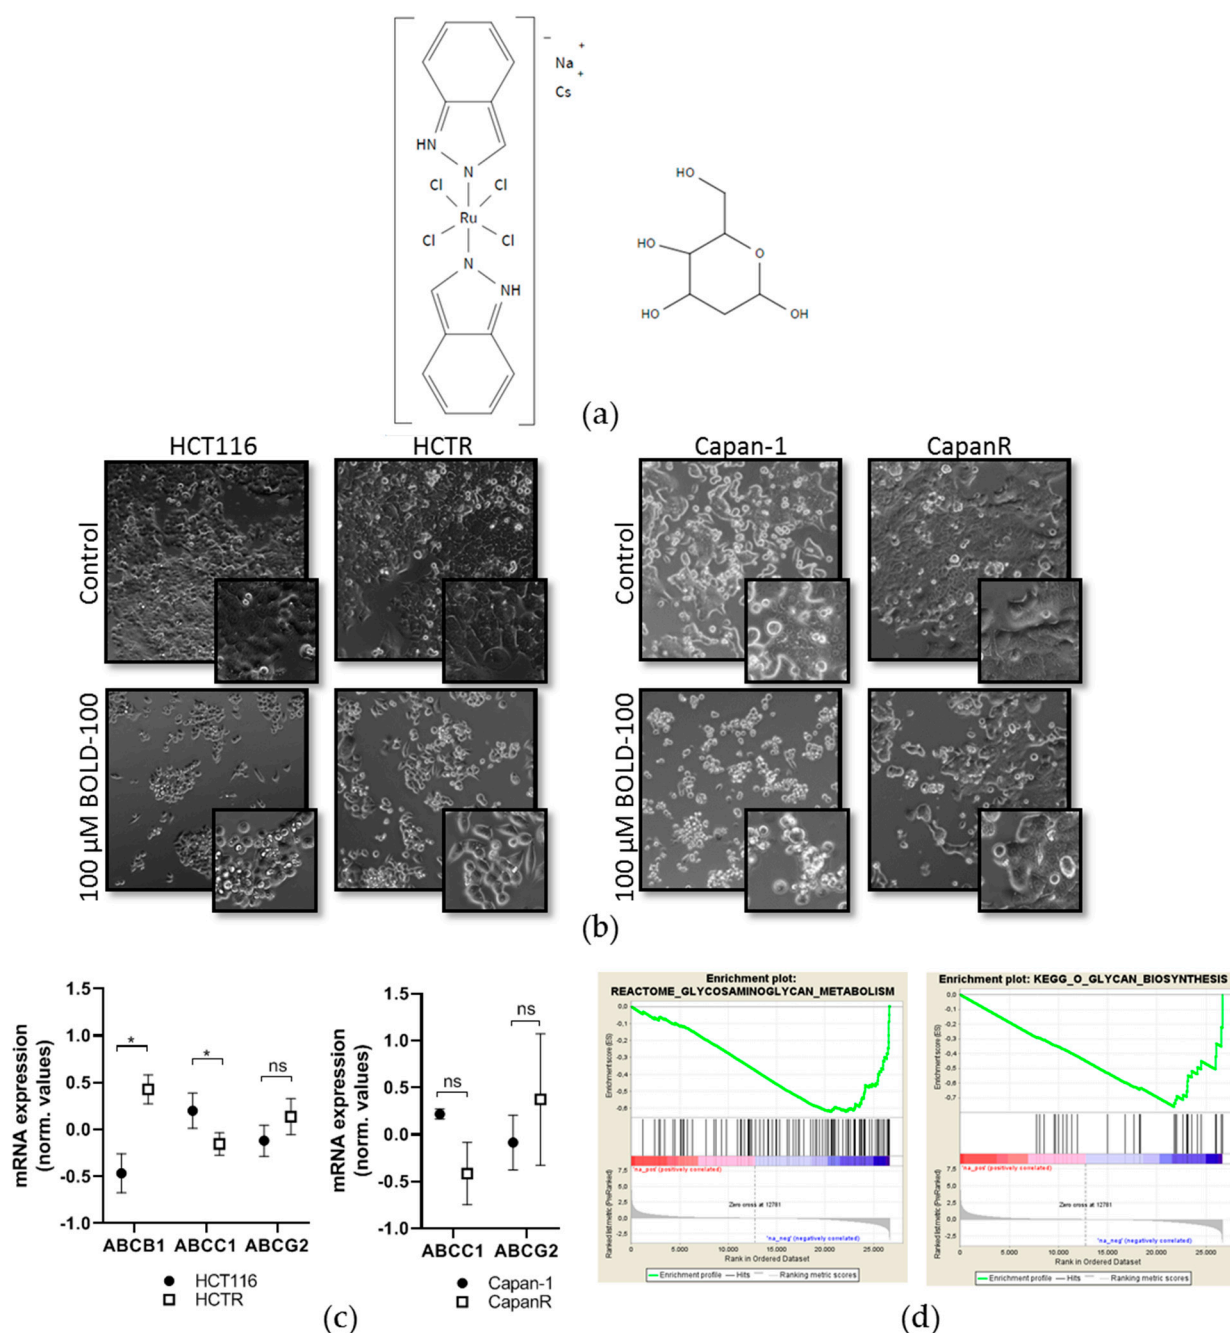

Figure S1 BOLD-100 treatment affects the cellular carbohydrate metabolism and acquired resistance is independent from drug transporter expression changes (a) Chemical structures of BOLD-100 (left) with cesium as an intermediate salt form and 2-DG (right)

created with SciFinder (Copyright © 2022 American Chemical Society). (b) Representative phase-contrast photomicrographs (4x magnification) after 24 h of treatment with 100  $\mu$ M of BOLD-100 to indicate morphologic changes of parental and acquired BOLD-100-resistant HCT116 cells. Enlargements are 10x magnified. (c) Normalized mRNA expression of ABC drug transporters ABCB1, ABCC1, and ABCG2 in HCT116 and HCTR or Capan-1 and CapanR cells. In Capan cell models, ABCB1 mRNA expression was below the detection limit. The statistical significance of differences was calculated with an unpaired two-tailed Student's t-test: \* $p$ <0.05; ns: non-significant. (d) GSEA identified "GLYCOSAMINOGLYCAN\_METABOLISM" (nominal  $p$ -value <  $E^{-7}$ , FDR  $q$ -value = 0.003, and normalized enrichment score (NES) = -1.861) as top fourth downregulated gene set according to the REACTOME database and "O\_GLYCAN\_BIOSYNTHESIS" (nominal  $p$ -value <  $E^{-7}$ , FDR  $q$ -value = 0.003, and normalized enrichment score (NES) = -1.847) as top seventh downregulated gene set according to the KEGG database upon 100  $\mu$ M BOLD-100 treatment for 6 h in HCT116 cells.

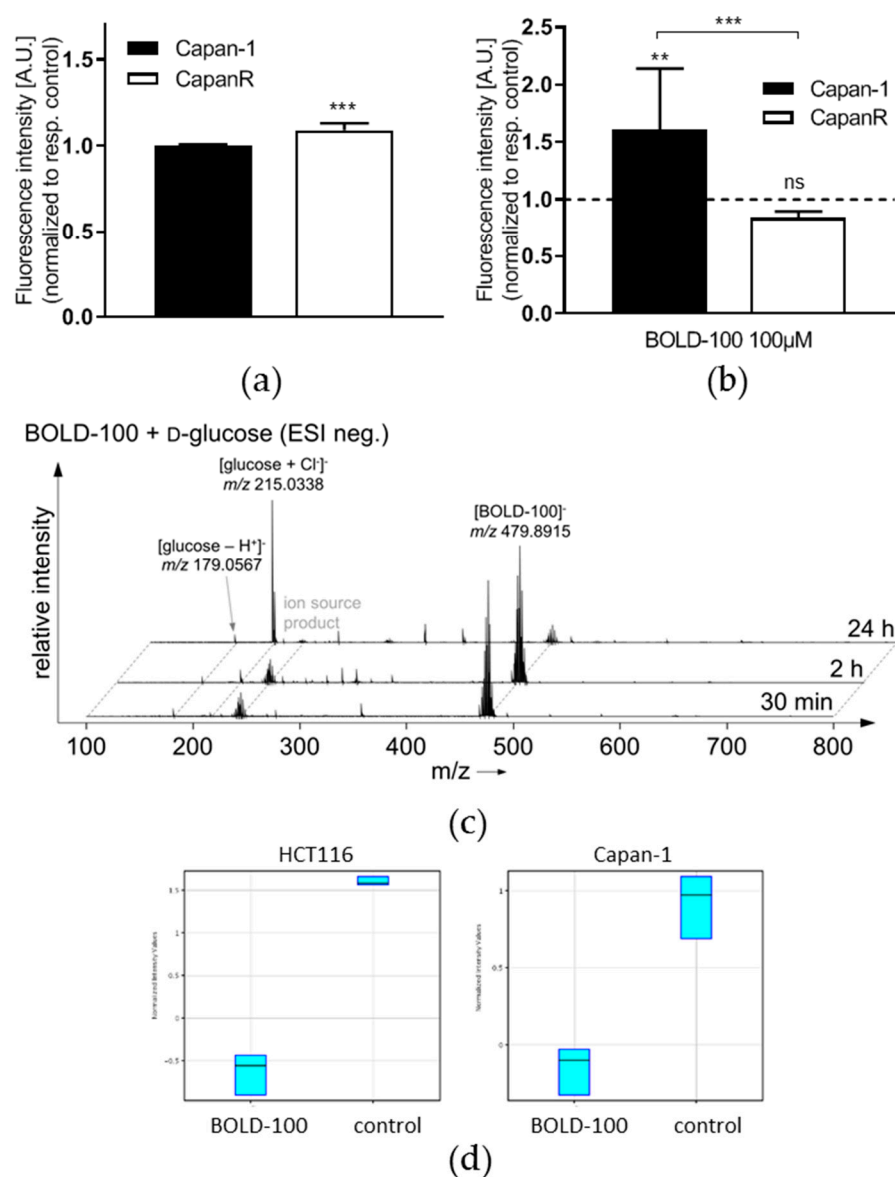

**Figure S2 Acquired BOLD-100-resistance is characterized by enhanced glucose uptake and BOLD-100 treatment reduces HK2 expression independent from drug-glucose adduct formation.** FACS analysis of fluorescence intensity (arbitrary units, a.u.) of glucose-starved Capan-1 and CapanR cells after 1 h incubation with 25  $\mu$ M of 2-NBDG following treatment with solvent control (a) or 100  $\mu$ M of BOLD-100 (b) for 24 h. Results are mean of triplicates  $\pm$  SD of two independent experiments. In (b) data are normalized

to the respective control (dashed line). Statistical significance of differences was calculated with a two-tailed unpaired student's t-test (a) or two-way ANOVA with Tukey's multiple comparisons test (b): \*\*\* $p < 0.001$ ; ns: non-significant. (c) Mass spectra of the interaction between BOLD-100 and D-glucose (1 : 4 molar ratio) acquired in the negative ion mode after the indicated incubation times. (d) Relative mRNA expression of HK2 in HCT116 and Capan-1 cells with or without 6 h treatment with 100  $\mu$ M of BOLD-100.

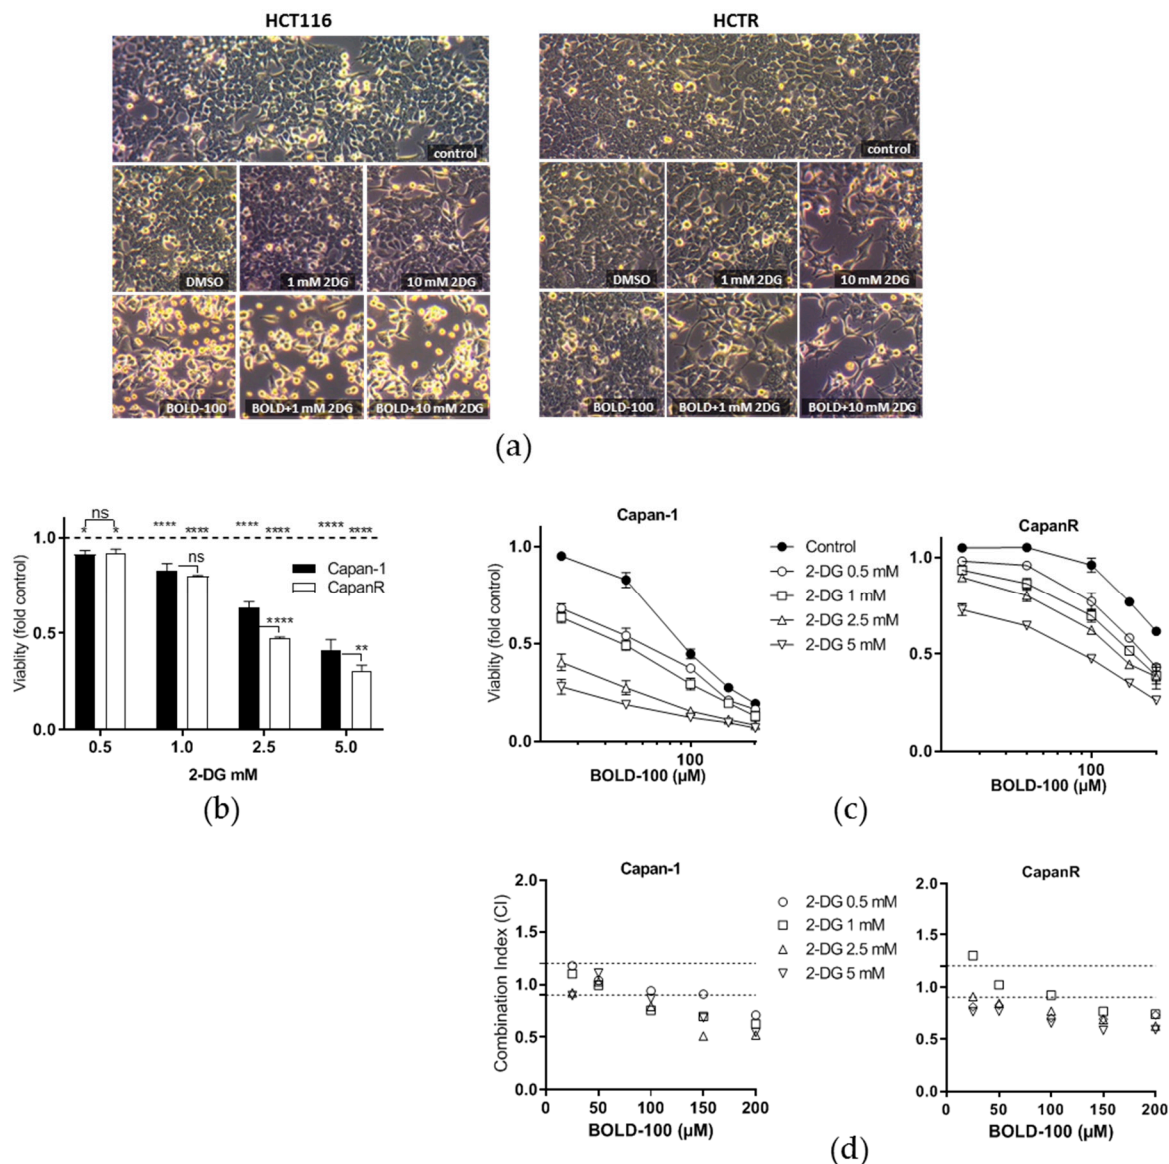

**Figure S3 Acquired BOLD-100-resistant Capan-1 and HCT116 cells are hypersensitive to 2-DG and the anticancer effect can be boosted in combination with BOLD-100.** (a) Respective phase-contrast photomicrographs (10x magnification) of HCT116 and HCTR cells after 24 h of treatment with 100  $\mu$ M of BOLD-100 or the indicated concentrations of 2-DG, or the combination of both compounds to indicate morphologic changes. Two different control states were included, i.e. the medium control without and with DMSO. (b) Cell viability assay of Capan-1 vs. CapanR cells after 72 h of treatment with 2-DG relative to respective controls (dashed line). The statistical significance of differences was determined using a two-way ANOVA with Tukey's multiple comparisons test: \*\* $p < 0.01$ , \*\*\* $p < 0.0001$  (c) Cell viability of Capan-1 and CapanR cells upon 72 h treatment with BOLD-100 in combination with 2-DG at the indicated concentrations determined by MTT assay. Data are mean of triplicates  $\pm$  SD. One representative of three independent experiments is shown. (d) Combination indices (CI) based on cell viability data from Capan-1 and CapanR cells treated with BOLD-100 in combination with 2-DG at the indicated concentrations for 72 h. CI < 0.9, synergism; CI = 0.9-1.2, additive effects; or CI > 1.2 antagonism.

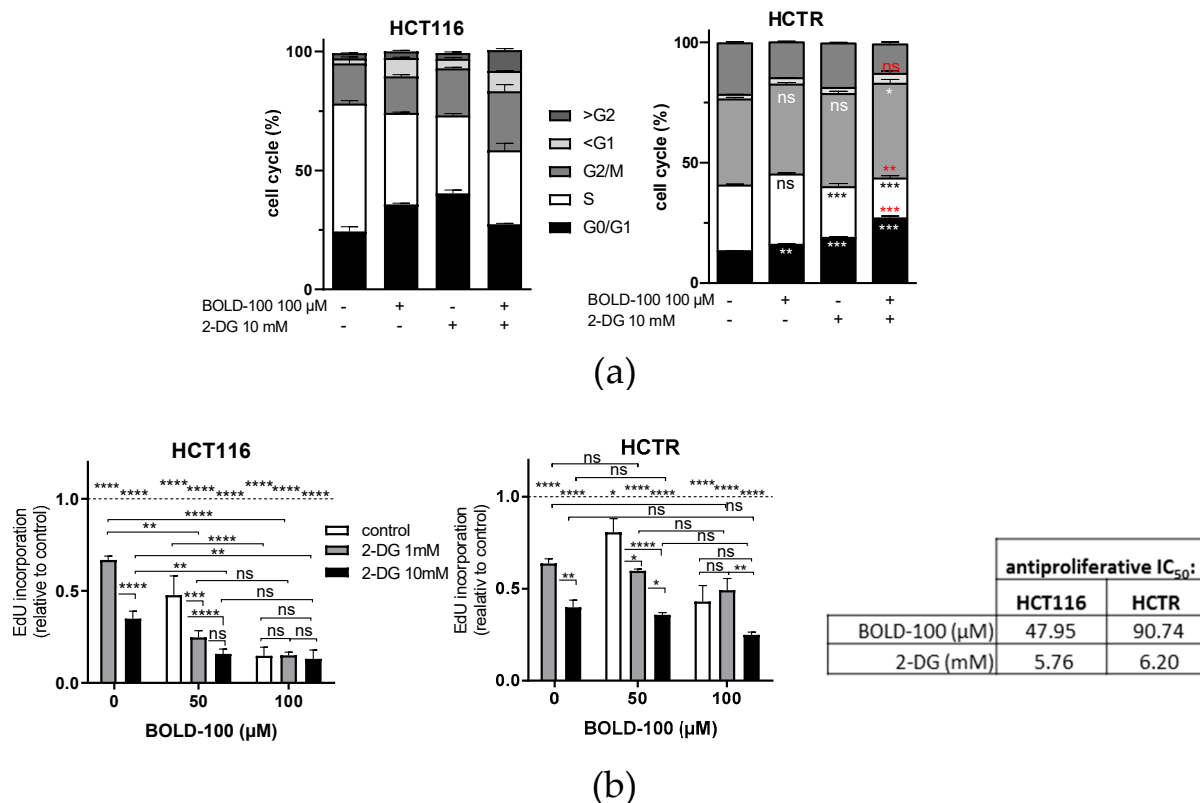

**Figure S4 Regulation of cell cycle distribution and proliferation by 2-DG and BOLD-100.** (a) Cell cycle analysis determining the DNA content of the indicated ethanol-fixed, PI-stained cells after 24 h of treatment with the indicated drug concentrations by flow cytometry. Controls contained the amount of DMSO corresponding to 100 μM of BOLD-100. Percentages of 50.000 cells in G0/G1, S, G2/M, and <G1 or >G2 phase of cell cycle were calculated by FlowJo software. The statistical significance of differences was determined using a one-way ANOVA with Tukey's multiple comparisons test: \* $p < 0.05$ , \*\* $p < 0.01$ , \*\*\* $p < 0.001$ ; ns: non-significant. Black and white asterisks indicate significant difference as compared to the control and red asterisks show significant differences compared to the single treatments. (b) EdU incorporation assay of HCT116 and HCTR cells after 24 h of treatment with either 2-DG or BOLD-100 or their combination at the indicated concentrations relative to respective controls (dashed line). Controls contained the amount of DMSO corresponding to 100 μM of BOLD-100. Data are mean of triplicates  $\pm$  SD of one representative experiment. The statistical significance of differences was determined using a two-way ANOVA with Tukey's multiple comparisons test: \* $p < 0.05$ , \*\* $p < 0.01$ , \*\*\* $p < 0.001$ , \*\*\*\* $p < 0.0001$ ; ns: non-significant. Respective significance levels relative to the controls are indicated above the dashed lines. Significance between respective treatment groups is given beneath the dashed line. The table gives IC<sub>50</sub> values of the drug-respective antiproliferative activity.



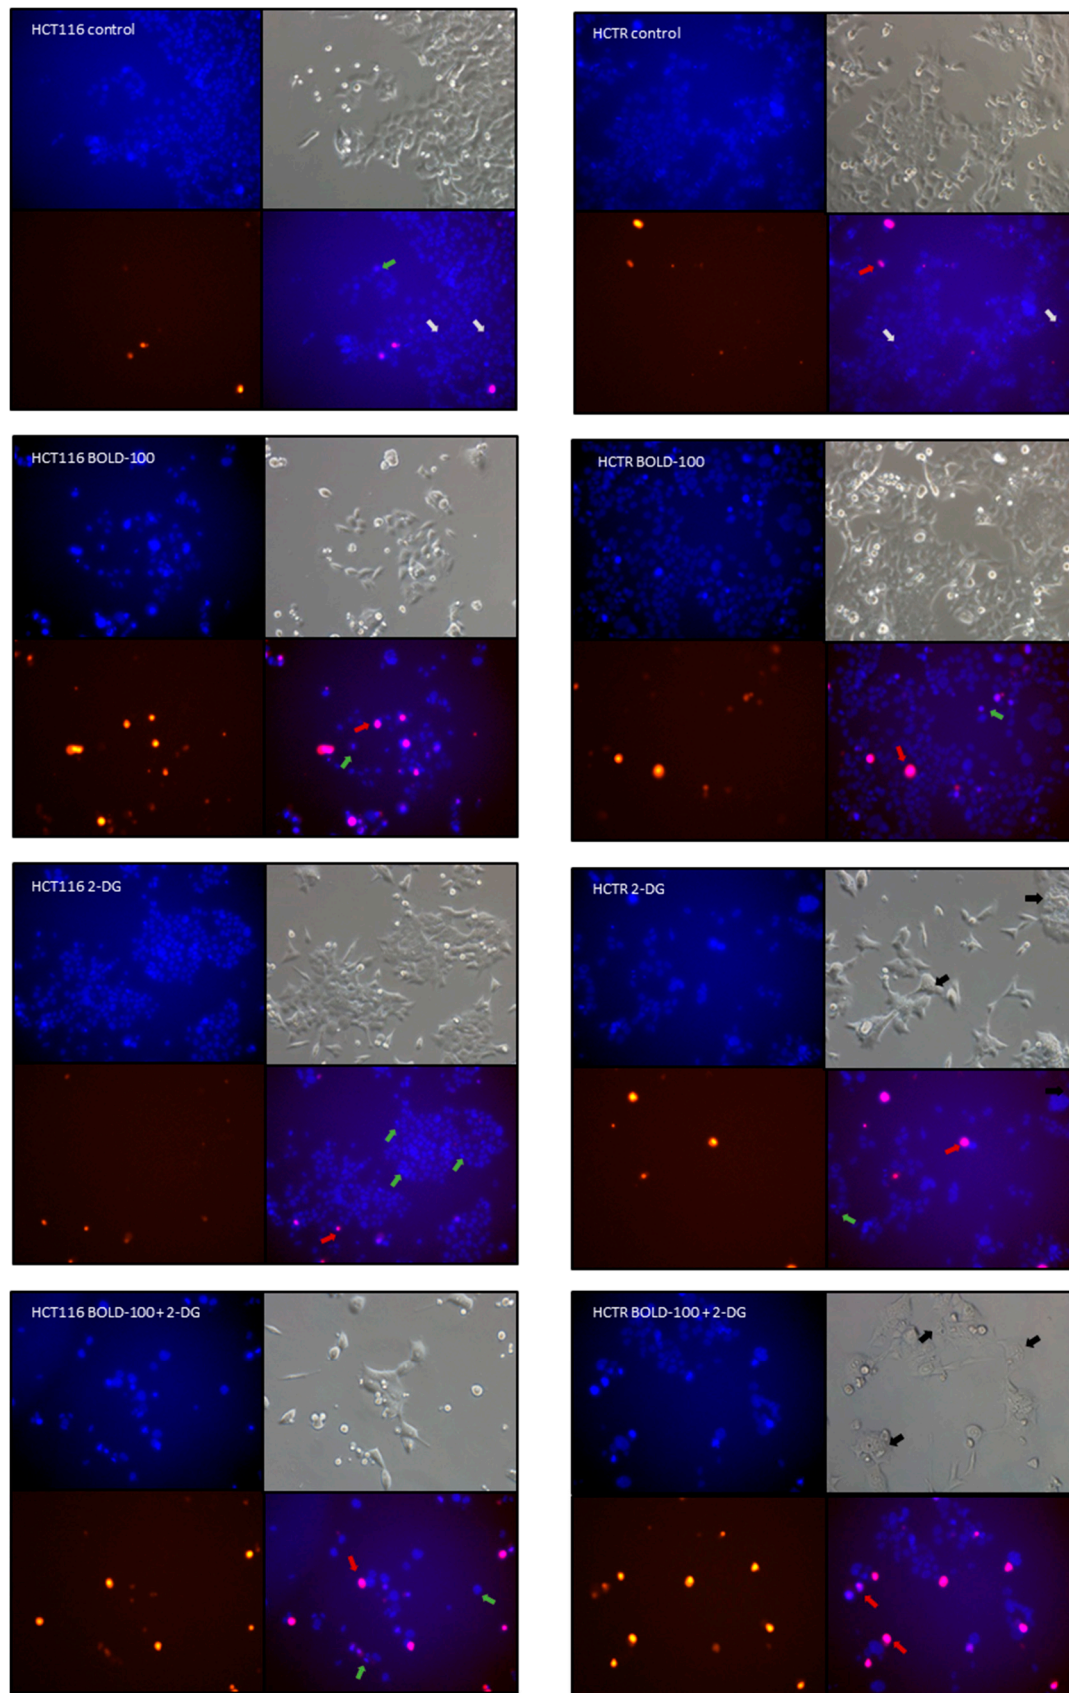

**Figure S5 Morphological assessment of apoptosis induction under 2-DG and BOLD-100 treatment by Hoechst 33342/PI dual-staining.** Representative images of Hoechst 33342 (blue)/PI (red)-stained HCT116 or HCTR cells after treatment for 72 h with DMSO (control, equivalent to BOLD-100), 2.5 mM of 2-DG or 100  $\mu$ M of BOLD-100 or their combination. Images were taken by fluorescence microscopy (magnification 20x). Phase contrast images display corresponding cellular morphological changes. Black arrows exemplarily indicate distinct morphological changes induced by 2-DG treatment.

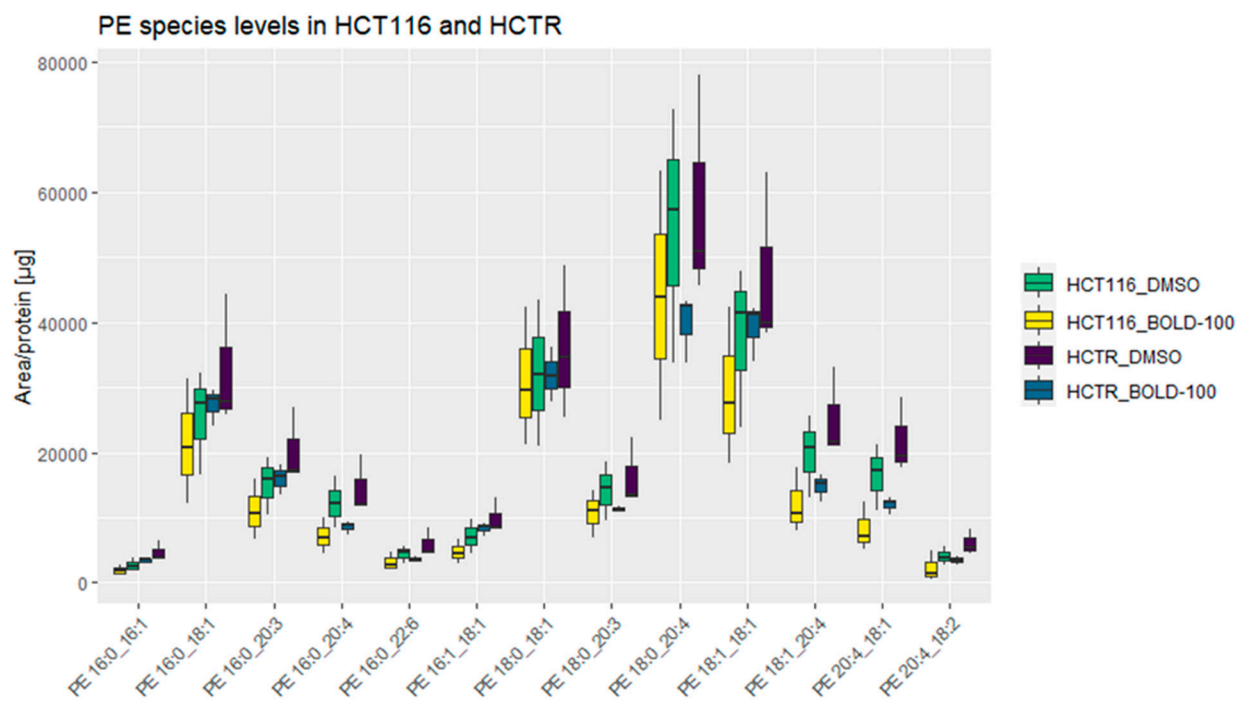

**Figure S6 Regulation of cellular phosphatidylethanolamine levels by BOLD-100.** Lipidomics analysis of HCT116 and HCTR cells treated with 100  $\mu$ M of BOLD-100 or the corresponding amount of DMSO for 24 h. Samples were analyzed with RP-UHPLC-HRMS followed by data evaluation in LipidSearch 5.0 and R Studio. All groups were measured in triplicates, integrated areas were normalized to the protein content [µg].

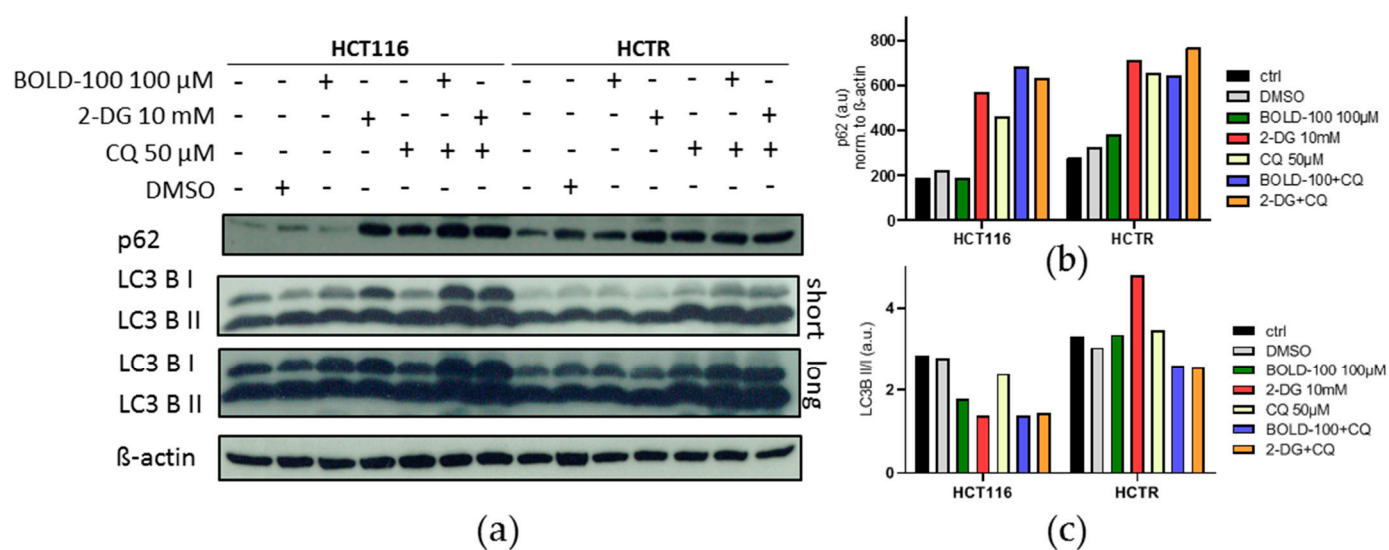

**Figure S7 Autophagy regulation by BOLD-100 and 2-DG under autophagic flux blockade by CQ.** (a) Expression levels of p62, and LC3B I/II in HCT116 and HCTR cells treated with 100  $\mu$ M of BOLD-100, 10 mM of 2-DG, 50  $\mu$ M of CQ, or their combination for 24 h analyzed by Western blotting. Two different control states were included, i.e. medium control for 2-DG and CQ or DMSO as solvent control for BOLD-100.  $\beta$ -actin served as loading control. LC3B signals are depicted with shorter (upper) and longer (lower) exposure times. (b) Quantification of treatment-respective p62 intensities of Western blot signals depicted in (a). (c) Calculation of treatment-respective LC3B II/I ratio from protein expression detected in (a).
